## 1 Identification of 15 new bypassable essential genes of fission yeast

2  
3 Aoi Takeda<sup>1</sup>, Shigeaki Saitoh<sup>2</sup>, Hiroyuki Ohkura<sup>3</sup>, Kenneth E. Sawin<sup>3</sup> and Gohta Goshima<sup>1#</sup>

4  
5 <sup>1</sup> Division of Biological Science, Graduate School of Science, Nagoya University, Furo-cho,  
6 Chikusa-ku, Nagoya 464-8602, Japan

7 <sup>2</sup> Division of Cell Biology, Institute of Life Science, Kurume University, Kurume, Fukuoka  
8 830-0011, Japan

9 <sup>3</sup> Wellcome Centre for Cell Biology, School of Biological Sciences, University of Edinburgh,  
10 Michael Swann Building, Max Born Crescent, Edinburgh EH9 3BF, UK

11  
12 #Correspondence should be addressed to: [goshima@bio.nagoya-u.ac.jp](mailto:goshima@bio.nagoya-u.ac.jp)

13 Phone: +81 52-788-6175

### 14 15 Abstract

16 Every organism has a different set of genes essential for its viability. This indicates that an  
17 organism can become tolerant to the loss of an essential gene under certain circumstances during  
18 evolution, via the manifestation of ‘masked’ alternative mechanisms. In our quest to  
19 systematically uncover masked mechanisms in eukaryotic cells, we developed an extragenic  
20 suppressor screening method using haploid spores deleted of an essential gene in the fission yeast  
21 *Schizosaccharomyces pombe*. We screened for the ‘bypass’ suppressors of lethality of 92  
22 randomly selected genes that are essential for viability in standard laboratory culture conditions.  
23 Remarkably, extragenic mutations bypassed the essentiality of as many as 20 genes (22%), 15 of  
24 which have not been previously reported. Half of the bypass-suppressible genes were involved in  
25 mitochondria function; we also identified multiple genes regulating RNA processing. 18  
26 suppressible genes were conserved in the budding yeast *Saccharomyces cerevisiae*, but 13 of them  
27 were non-essential in that species. These trends are consistent with a recent independent  
28 bypass-of-essentiality (BOE) screening of 142 fission yeast genes conducted with more elaborate  
29 methodology (Li *et al.*, 2019). Thus, our study reinforces the emerging view that BOE is not a rare  
30 event and that each organism may be endowed with secondary or backup mechanisms that can  
31 substitute for primary mechanisms in various biological processes. Furthermore, the robustness of  
32 our simple spore-based methodology paves the way for genome-scale BOE screening.

### 33 34 Introduction

35 A recent genome-wide study using *S. cerevisiae* gave an insight into the ‘evolvability’ of  
36 essential cellular processes (Liu *et al.*, 2015), which can be also termed ‘bypass-of-essentiality’  
37 (BOE) (Li *et al.*, 2019). The study surveyed the viability of every essential gene disruptant in *S.*  
38 *cerevisiae* (1,106 genes), and found that 9% of the gene disruptants proliferate and form colonies  
39 spontaneously (i.e. without artificial mutagenesis). Genome analysis showed that most of the  
40 proliferating strains had gained an extra chromosome (i.e. aneuploidy), which is typically an  
41 outcome of chromosome missegregation. This is a reasonable path to BOE in *S. cerevisiae*,  
42 because its haploid is tolerant to a chromosome gain for 13 of 16 chromosomes (Torres *et al.*,  
43 2007). However, we speculated that there might be many more bypassable essential genes in yeast,  
44 as some non-bypassable essential gene disruptants might recover their viability by acquiring  
45 extragenic mutations, which are rarely introduced without mutagenesis.

1 Comprehensive identification of suppressor mutations would help to elucidate secondary or  
2 backup mechanisms that can substitute for primary mechanisms. Hitherto ‘masked’, these  
3 alternative mechanisms may act as the dominant pathways in specific cell types and/or diseased  
4 cells. To this end, we designed a BOE screening using the fission yeast *S. pombe*, which has a  
5 similar number (1,260) of essential genes to *S. cerevisiae* (Kim *et al.*, 2010). A notable difference  
6 from *S. cerevisiae* is that *S. pombe* has only 3 chromosomes, and the haploid yeast is inviable  
7 when an extra copy of either chromosome I or II (the two larger chromosomes) is inherited (Niwa  
8 and Yanagida, 1985). Thus, BOE via extra chromosome gain is likely an infrequent event in *S.*  
9 *pombe*. In the present study, we carried out BOE screening for randomly selected 92 essential  
10 genes in *S. pombe*, based on UV mutagenesis of spores in which essential genes were deleted.

## 11 **Materials and methods**

### 12 *Yeast strains and media*

13 A diploid named G29 was used as the host ( $h^+$  *his2 leu1 ura4-D18 ade6-216 / h<sup>-</sup> leu1 ura4-D18*  
14 *ade6-210 rpl42.sP56Q*), where *rpl42.sP56Q* allele was used as a counter-selection marker against  
15 cycloheximide (Roguev *et al.*, 2007). Conventional genetic experiments followed (Moreno *et al.*,  
16 1991). Yeast was grown on complete YE5S medium (YE supplemented with leucine, uracil,  
17 adenine, lysine, and histidine) or the synthetic PMG or EMM medium at 32°C (plate) or 30°C  
18 (liquid). Sporulation was induced on the SPA plate or in the EMMG liquid medium (i.e. PMG  
19 containing 1 g/L sodium glutamate instead of 3.75 g/L).

### 21 *Gene disruption*

22 Essential genes were selected based on information found in the Pombase database (Wood *et al.*,  
23 2012). 92 genes on chromosome II were randomly selected. Conventional one-step replacement  
24 was conducted using ~500-bp homologous sequences (5'UTR and 3'UTR of the gene to be  
25 deleted) (Krawchuk and Wahls, 1999). A tandem G418-resistance (kanMX) */ura4+* cassette was  
26 used as the selection marker (however, *ura4+* marker was not actually used for selection). For  
27 most genes, we directly generated a linear construct (5'UTR-G418-*ura4+*-3'UTR) by two rounds  
28 of PCR using two sets of primers (i.e. nested PCR). In some cases, the PCR fragment was cloned  
29 into a vector using an Infusion kit (Takara), and the linear construct was amplified with T7/T3  
30 primer set from the plasmid template. The linear DNA was transformed into the G29 diploid strain  
31 using the standard lithium acetate/PEG-mediated method, and disruption of the target gene was  
32 confirmed by colony PCR using KOD-Fx-Neo or KOF-ONE kit (Toyobo). When the endogenous  
33 gene and G418-*ura4+* cassette had a similar length, we used a longer version of G418-*ura4+*  
34 cassette to distinguish disrupted and endogenous alleles by length. PCR primers for gene  
35 disruptions and their confirmation are listed in Table S1.

### 37 *Spore isolation*

38 Exponentially growing heterozygous diploid cells in YE5S (+10 µg/ml G418) were harvested and  
39 transferred to EMMG medium ( $1 \times 10^6$  cells/ml). After shaking at 200 rpm and 30°C for  $\geq 36$  h,  
40 cells were harvested, washed twice with sterile water, and resuspended in 0.5% glusulase solution.  
41 The solution was shaken at 80 rpm at room temperature overnight to digest non-sporulated cells.  
42 The spores were harvested and further treated with 30% ethanol for 30 min (80 rpm, room  
43 temperature) to further remove diploid cell contamination. The purified spores were resuspended  
44 in sterile water and stored at 4°C.

### 1 *Spore quality check*

2 Prior to UV mutagenesis, the viability and purity of spores were determined by plating onto  
3 normal YE5S plate and YE5S supplemented with G418 (100 µg/ml) and cycloheximide (100  
4 µg/ml), respectively. No haploid spores were expected to grow on the G418/cycloheximide plate,  
5 since an essential gene had been replaced with G418. However, colonies were always formed  
6 typically at  $\sim 1 \times 10^{-6}$  frequencies. Cells in these colonies were diploids, which we interpreted to be  
7 derived from diploid spores generated at low frequency during meiosis; diploid spores would also  
8 be resistant to glusulase or ethanol. In cases in which the putative diploid contamination frequency  
9 was  $< 5 \times 10^{-5}$ , we moved on to UV mutagenesis and screening. In cases in which the  
10 contamination frequency was  $\geq 5 \times 10^{-5}$ , we discarded the sample and repeated the spore isolation  
11 process. The reason for differences in the prevalence of putative diploid spores is unknown.  
12

### 13 *BOE screening with UV mutagenesis*

14  $1 \times 10^7$  spores were plated onto a YE5S plate containing G418 (100 µg/ml) and cycloheximide  
15 (100 µg/ml), followed by UV irradiation ( $90 \times 100 \mu\text{J}/\text{cm}^2$ : UV Crosslinker, CL-1000, 254 nm,  
16 100 V, 8 W [UVP/Analytik Jena] or Stratalinker UV crosslinker Model 1800 [Stratagene]). Under  
17 these conditions, spore viability was approximately 1%. Cycloheximide allows counter-selection  
18 against *rpl42+* gene; in the presence of cycloheximide, haploids possessing the *rpl42.sP56Q* allele  
19 can grow but not parental heterozygous diploids (Roguev et al., 2007). Plates were incubated at  
20 32°C for 7 d. In most cases, we detected colonies. To check if each colony represents BOE or  
21 diploid contamination, we replica-plated onto EMM minus adenine and SPA plates. After  
22 checking spore formation by iodine treatment on SPA, we selected the Ade- and  
23 non-spore-forming colonies as candidate BOE haploids; colonies that did not match this criterion  
24 were likely diploids and disregarded. The candidate colonies were subjected to colony PCR, with  
25 which the disruption of the target gene was reconfirmed (see Fig. 2B). For *top3Δ*, we performed  
26 mutagenesis in a *rad13Δ* (DNA repair-deficient) background, in order to decrease UV power  
27 ( $1,500 \mu\text{J}/\text{cm}^2$ , 5% viability) and avoid cytotoxicity. However, since we obtained expected BOE  
28 results for *cut7Δ* in the presence of *rad13+*, we did not introduce *rad13Δ* for any other genes.  
29

### 30 *Whole-genome sequencing and sequence analysis*

31 To identify suppressor mutations, bulk segregant analysis was performed. Survivor strains were  
32 crossed with a wild-type strain, and spores were plated on G418-containing YE5S plates. After 7 d,  
33  $\sim 1,000$  colonies were collected and DNA was extracted with Dr. GenTLE (Takara). Genomic  
34 DNA (1 µg) was sequenced by BGI or Novogene (1 Gb), and the reads were mapped to the  
35 reference genome (*Schizosaccharomyces pombe*.ASM294v2.genebank.gb) using CLC Genomics  
36 Workbench. Unique and homogenous Indels and SNPs identified for each strain were manually  
37 inspected using Integrative Genomics Viewer (IGV).  
38

## 39 **Results & Discussion**

40 Fig. 1 illustrates the scheme of our BOE screening. A heterozygous diploid in which one  
41 copy of an essential gene was replaced with a drug (G418)-resistant marker was sporulated. The  
42 spores were plated on G418-containing plates and simultaneously mutagenized by UV irradiation.  
43 If a haploid colony is obtained on this plate, it has likely acquired a suppressor mutation(s),  
44 indicating that the essentiality of the gene has been bypassed.

45 We first applied this method to two gene disruptants, *cut7Δ* (kinesin-5) and *top3Δ* (type I  
46 topoisomerase), the lethality of which is known to be suppressed by the loss of function of Pkl1

1 (kinesin-14) and Rqh1 (recQ helicase), respectively (Goodwin *et al.*, 1999; Olmsted *et al.*, 2014;  
2 Syrovatkina and Tran, 2015). For *cut7Δ*, we obtained a total of 8 haploid colonies in the first  
3 experiment and 30 more in a later experiment, in which 5-fold more spores were mutagenized  
4 (Fig. 2A, B). We analysed 26 colonies by target sequencing of *pkll* and *msd1* genes (Msd1 is a  
5 positive regulator of Pkl1 (Yukawa *et al.*, 2015)), whole-genome sequencing, and/or genetic  
6 linkage test (*pkll* locus is close to the *rpl42* locus, at which a mutation was introduced to confer  
7 cycloheximide resistance in our strain). The combined results suggested that suppressor mutations  
8 reside in *pkll* for 19 strains and in *msd1* for the remaining 7 strains (Fig. 2C, E). Mutagenesis of  
9 *top3Δ* yielded 3 haploid strains (Fig. 2D), and direct sequencing of the *rqh1* gene identified a  
10 mutation in all cases (Fig. 2E). Thus, our screening successfully elucidated known BOE  
11 relationships.

12 We then expanded the screening to 92 essential genes located on chromosome II. For 20 of  
13 these, we obtained 1~17 haploid colonies, which corresponds to 22% (Fig. 3). This frequency is  
14 much higher than that obtained in the previous mutagenesis-free screening in *S. cerevisiae* (Liu *et al.*,  
15 2015).

16 The 20 suppressible genes possess divergent known biological functions. 10 genes (50%)  
17 were related to mitochondrial function (Fig. 4A). This may be partly explained by the fact that, in  
18 the regular medium containing >2% glucose, cell proliferation does not depend much on  
19 mitochondrial respiration (Takeda *et al.*, 2015). 6 genes were associated with RNA processing and  
20 ribosome functions; the basis of these trends are unclear. Overall, 90% of the genes had clear  
21 orthologues in *S. cerevisiae* and *H. sapiens*, indicating that BOE is not limited to unconserved  
22 genes (Fig. 4B, C). However, the orthologues of 70% genes were reported to be non-essential in *S.*  
23 *cerevisiae* (Fig. 4D). An obvious next step would be to identify suppressor mutations of each  
24 survivor to understand how an essential mechanism can be bypassed.

25 In the course of this project, a conceptually identical study was published (Li *et al.*, 2019). In  
26 this study using *S. pombe* haploid, BOE was screened by 3 methods: chemical mutagenesis  
27 (termed C-BOE), transposon-based mutagenesis (T-BOE), and gene library overexpression  
28 (OP-BOE). While C-BOE is the most similar approach to ours, the methodology employed is  
29 different. Li *et al.* (2019) did not use spores; instead, the essential gene disruptant was kept viable  
30 by the transformation of a plasmid that contains the deleted gene: if a colony that had lost the  
31 plasmid was recovered, it was interpreted to indicate BOE. Li *et al.* (2019) obtained survivors for  
32 27% of the genes in one or more BOE assays, which is a similar frequency to ours.

33 Coincidentally, in the two studies, 29 common essential genes were screened. Upon  
34 comparison, 21 genes were not bypassable in both studies, whereas 5 genes were common BOE  
35 hits. 2 and 1 hits were uniquely found in their and our studies, respectively (Fig. 3). Thus, the  
36 comparison indicates that both screens had a good agreement in bypassability, but also suggests  
37 that a single screen cannot identify all possible BOE.

38 Li *et al.* (2019) further identified suppressor genes responsible for BOE. For example, they  
39 found that the mutation/overexpression of 6 components of the 19S proteasome compensates for  
40 mitochondrial dysfunction, suggesting a link between proteasome alteration and mtDNA  
41 dispensability. To test if our screen identified the same set of extragenic suppressor genes as Li *et al.*  
42 *et al.*, we determined the whole-genome sequences of 3 BOE strains for *mrpl8* (mitochondrial  
43 ribosome protein), which was a C-BOE hit in Li *et al.* (2019). Interestingly, we identified  
44 mutations in *atp1* (F1-F0 ATP synthase alpha subunit (Falson *et al.*, 1991)) and *rpt3* (19S proteasome  
45 base subcomplex ATPase subunit (Kitagawa *et al.*, 2014)), which are very similar to what were found  
46 in Li *et al.* (2019) (*atp3*; F1-F0 ATP synthase gamma subunit; *mts4*; 19S proteasome regulatory subunit

1 (Wilkinson *et al.*, 1997)). In addition, our screen uniquely identified *hul5* (HECT-type ubiquitin-protein  
2 ligase E3 (Fang *et al.*, 2011)), which might function upstream of the proteasome. *pir2* (RNA silencing  
3 factor (Sugiyama *et al.*, 2016)) was another common hit, and Li *et al.* (2019) reported a single gene  
4 mutation in *dis3* (exosome 3'-5' exoribonuclease subunit (Murakami *et al.*, 2007)). However, we could  
5 not find *dis3* mutations in any of the 3 BOE strains we obtained, indicating that other genes had  
6 acquired suppressive mutations.

7 In summary, we have established an alternative sensitive—and perhaps less  
8 labour-intensive—methodology for mutagenesis-based BOE screening in fission yeast, and  
9 expanded the list of genes whose essentiality is bypassable. Our methodology allows for a  
10 straightforward scale-up of the screen, from which we expect to reveal masked cellular  
11 mechanisms.

### 12 **Acknowledgements**

13 We are grateful to Ye Dee Tay for various advices on this project; Ulzii Enhjin and Yukina Chiba  
14 for primer design; Elsa Tungadi and Juyoung Kim for their help in gene disruption and screening;  
15 Kazuma Uesaka and Kunio Ihara for their help in sequence analysis; Iain Hagan, Masamitsu Sato,  
16 and National Bio-Resource Project (NBRP) Japan for yeast strains and plasmids. This study  
17 originated when G.G. took a sabbatical in the K.E.S. laboratory. Work in the laboratory of K.E.S  
18 was supported by the Wellcome Trust (094517, 210659). The subsequent study in the G.G.  
19 laboratory was supported by JSPS KAKENHI (19K22383). H.O. laboratory is supported by the  
20 Wellcome Trust (098030, 206315).

### 21 **Author contributions**

22 G.G. conceived the project. G.G., S.S. H.O. and K.E.S. designed the research. A.T. and G.G.  
23 performed experiments. A.T., K.E.S. and G.G. analysed the data. S.S. and K.E.S. contributed  
24 resources. G.G. wrote the paper. S.S., H.O. and K.E.S. reviewed and edited the paper.

### 25 **References**

- 26 Falson, P., Maffey, L., Conrath, K., and Boutry, M. 1991. Alpha subunit of mitochondrial  
27 F1-ATPase from the fission yeast. Deduced sequence of the wild type and identification of  
28 a mutation that alters apparent negative cooperativity. *J Biol Chem*, **266**: 287-293.
- 29 Fang, N.N., Ng, A.H., Measday, V., and Mayor, T. 2011. Hul5 HECT ubiquitin ligase plays a  
30 major role in the ubiquitylation and turnover of cytosolic misfolded proteins. *Nat Cell Biol*,  
31 **13**: 1344-1352.
- 32 Goodwin, A., Wang, S.W., Toda, T., Norbury, C., and Hickson, I.D. 1999. Topoisomerase III is  
33 essential for accurate nuclear division in *Schizosaccharomyces pombe*. *Nucleic Acids Res*,  
34 **27**: 4050-4058.
- 35 Kim, D.U., Hayles, J., Kim, D., Wood, V., Park, H.O., Won, M., Yoo, H.S., Duhig, T., Nam, M.,  
36 Palmer, G., Han, S., Jeffery, L., Baek, S.T., Lee, H., Shim, Y.S., Lee, M., Kim, L., Heo,  
37 K.S., Noh, E.J., Lee, A.R., Jang, Y.J., Chung, K.S., Choi, S.J., Park, J.Y., Park, Y., Kim,  
38 H.M., Park, S.K., Park, H.J., Kang, E.J., Kim, H.B., Kang, H.S., Park, H.M., Kim, K.,  
39 Song, K., Song, K.B., Nurse, P., and Hoe, K.L. 2010. Analysis of a genome-wide set of  
40 gene deletions in the fission yeast *Schizosaccharomyces pombe*. *Nat Biotechnol*, **28**:  
41 617-623.

- 1 Kitagawa, T., Ishii, K., Takeda, K., and Matsumoto, T. 2014. The 19S proteasome subunit Rpt3  
2 regulates distribution of CENP-A by associating with centromeric chromatin. *Nat*  
3 *Commun*, **5**: 3597.
- 4 Krawchuk, M.D. and Wahls, W.P. 1999. High-efficiency gene targeting in *Schizosaccharomyces*  
5 *pombe* using a modular, PCR-based approach with long tracts of flanking homology.  
6 *Yeast*, **15**: 1419-1427.
- 7 Li, J., Wang, H.T., Wang, W.T., Zhang, X.R., Suo, F., Ren, J.Y., Bi, Y., Xue, Y.X., Hu, W., Dong,  
8 M.Q., and Du, L.L. 2019. Systematic analysis reveals the prevalence and principles of  
9 bypassable gene essentiality. *Nat Commun*, **10**: 1002.
- 10 Liu, G., Yong, M.Y., Yurieva, M., Srinivasan, K.G., Liu, J., Lim, J.S., Poidinger, M., Wright,  
11 G.D., Zolezzi, F., Choi, H., Pavelka, N., and Rancati, G. 2015. Gene Essentiality Is a  
12 Quantitative Property Linked to Cellular Evolvability. *Cell*, **163**: 1388-1399.
- 13 Moreno, S., Klar, A., and Nurse, P. 1991. Molecular genetic analysis of fission yeast  
14 *Schizosaccharomyces pombe*. *Methods Enzymol*, **194**: 795-823.
- 15 Murakami, H., Goto, D.B., Toda, T., Chen, E.S., Grewal, S.I., Martienssen, R.A., and Yanagida,  
16 M. 2007. Ribonuclease activity of Dis3 is required for mitotic progression and provides a  
17 possible link between heterochromatin and kinetochore function. *PLoS One*, **2**: e317.
- 18 Niwa, O. and Yanagida, M. 1985. Triploid meiosis and aneuploidy in *Schizosaccharomyces*  
19 *pombe*: an unstable aneuploid disomic for chromosome III. *Curr Genet*, **9**: 463-470.
- 20 Olmsted, Z.T., Colliver, A.G., Riehlman, T.D., and Paluh, J.L. 2014. Kinesin-14 and kinesin-5  
21 antagonistically regulate microtubule nucleation by gamma-TuRC in yeast and human  
22 cells. *Nat Commun*, **5**: 5339.
- 23 Roguev, A., Wiren, M., Weissman, J.S., and Krogan, N.J. 2007. High-throughput genetic  
24 interaction mapping in the fission yeast *Schizosaccharomyces pombe*. *Nat Methods*, **4**:  
25 861-866.
- 26 Samejima, I., Mackie, S., and Fantes, P.A. 1997. Multiple modes of activation of the  
27 stress-responsive MAP kinase pathway in fission yeast. *EMBO J*, **16**: 6162-6170.
- 28 Shieh, J.C., Wilkinson, M.G., Buck, V., Morgan, B.A., Makino, K., and Millar, J.B. 1997. The  
29 Mcs4 response regulator coordinately controls the stress-activated Wak1-Wis1-Sty1 MAP  
30 kinase pathway and fission yeast cell cycle. *Genes Dev*, **11**: 1008-1022.
- 31 Shiozaki, K., Shiozaki, M., and Russell, P. 1997. Mcs4 mitotic catastrophe suppressor regulates  
32 the fission yeast cell cycle through the Wik1-Wis1-Spc1 kinase cascade. *Mol Biol Cell*, **8**:  
33 409-419.
- 34 Sugiyama, T., Thillainadesan, G., Chalamcharla, V.R., Meng, Z., Balachandran, V.,  
35 Dhakshnamoorthy, J., Zhou, M., and Grewal, S.I.S. 2016. Enhancer of Rudimentary  
36 Cooperates with Conserved RNA-Processing Factors to Promote Meiotic mRNA Decay  
37 and Facultative Heterochromatin Assembly. *Mol Cell*, **61**: 747-759.
- 38 Syrovatkina, V. and Tran, P.T. 2015. Loss of kinesin-14 results in aneuploidy via  
39 kinesin-5-dependent microtubule protrusions leading to chromosome cut. *Nat Commun*, **6**:  
40 7322.
- 41 Takeda, K., Starzynski, C., Mori, A., and Yanagida, M. 2015. The critical glucose concentration  
42 for respiration-independent proliferation of fission yeast, *Schizosaccharomyces pombe*.  
43 *Mitochondrion*, **22**: 91-95.
- 44 Torres, E.M., Sokolsky, T., Tucker, C.M., Chan, L.Y., Boselli, M., Dunham, M.J., and Amon, A.  
45 2007. Effects of aneuploidy on cellular physiology and cell division in haploid yeast.  
46 *Science*, **317**: 916-924.

- 1 Wilkinson, C.R., Wallace, M., Seeger, M., Dubiel, W., and Gordon, C. 1997. Mts4, a non-ATPase  
2 subunit of the 26 S protease in fission yeast is essential for mitosis and interacts directly  
3 with the ATPase subunit Mts2. *J Biol Chem*, **272**: 25768-25777.
- 4 Wood, V., Harris, M.A., McDowall, M.D., Rutherford, K., Vaughan, B.W., Staines, D.M., Aslett,  
5 M., Lock, A., Bahler, J., Kersey, P.J., and Oliver, S.G. 2012. PomBase: a comprehensive  
6 online resource for fission yeast. *Nucleic Acids Res*, **40**: D695-699.
- 7 Yukawa, M., Ikebe, C., and Toda, T. 2015. The Msd1-Wdr8-Pkl1 complex anchors microtubule  
8 minus ends to fission yeast spindle pole bodies. *J Cell Biol*, **209**: 549-562.
- 9  
10

Figure 1

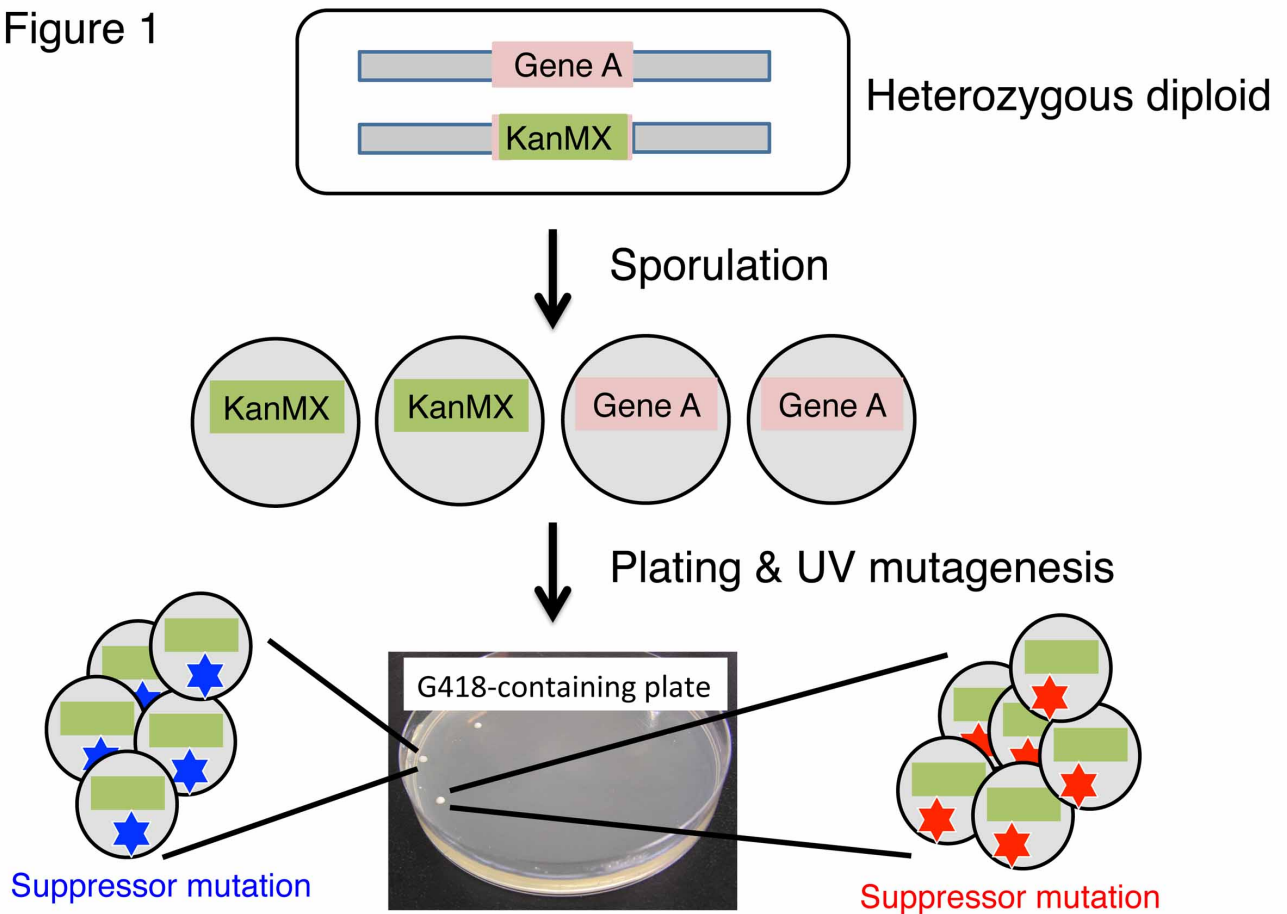

**Figure 1. Flowchart of BOE screening using haploid spores of fission yeast**

A copy of an essential gene (named 'A' in this figure) is replaced by the G418-resistant cassette (KanMX) in the diploid strain. This heterozygous diploid is viable since another copy of gene A remains intact. The diploid is sporulated in the nitrogen-limited medium. Spores with or without gene A are obtained at 1:1 ratio. The spores are spread onto G418-containing plate and then immediately irradiated with UV for mutagenesis. Only a spore with a suppressor mutation can grow and form a colony on the medium. The lack of gene A is confirmed by colony PCR.



## Figure 2

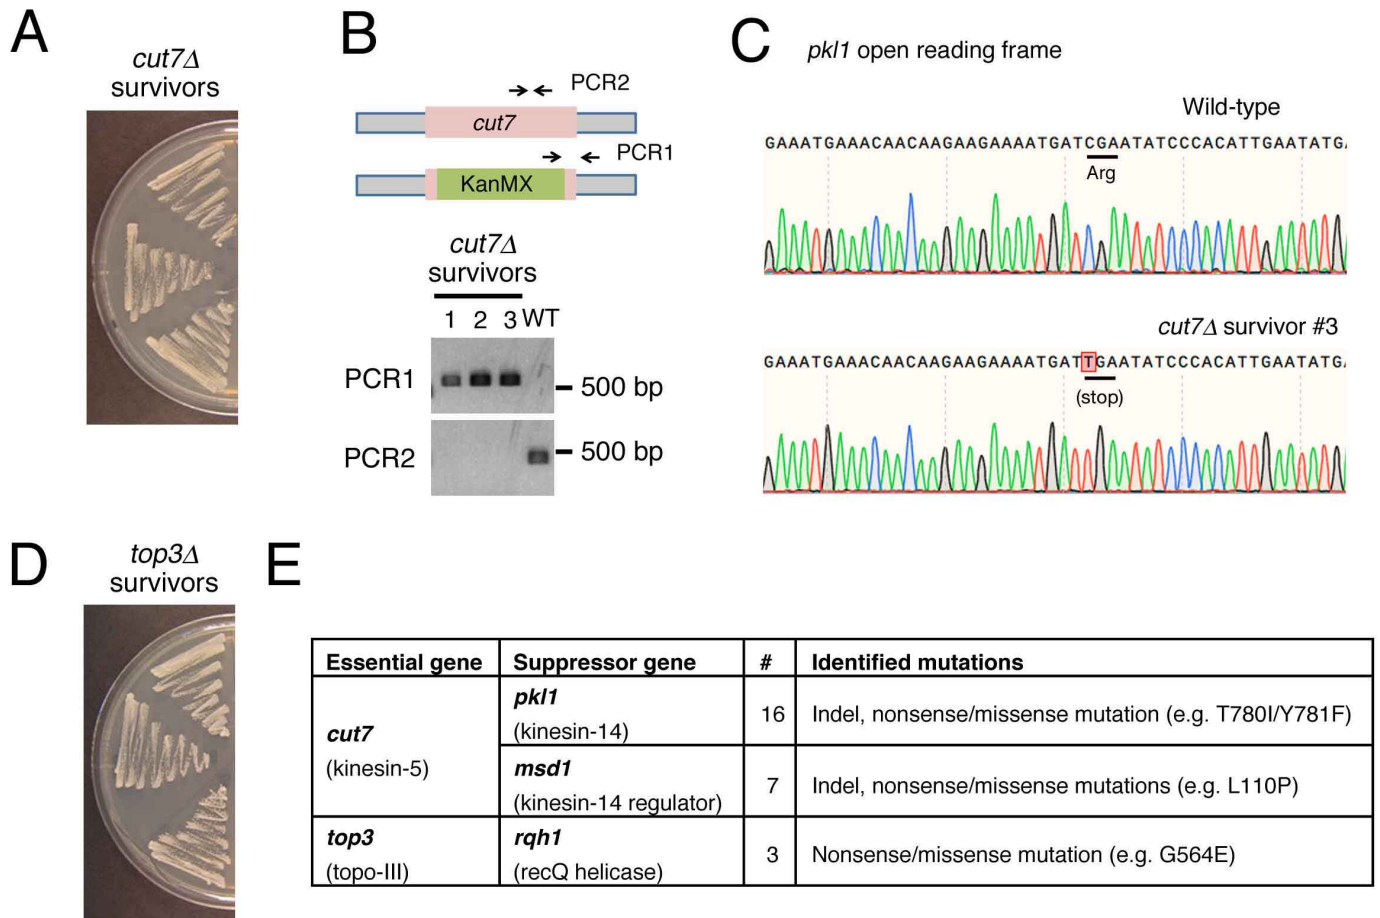

**Figure 2. Successful identification of known BOE**

(A) Three viable strains after UV mutagenesis of *cut7* $\Delta$  strain. In total, we obtained 38 BOE strains after UV mutagenesis of  $6 \times 10^7$  *cut7* $\Delta$  spores. (B) PCR to verify the lack of *cut7* gene for 3 haploid strains that formed colonies. (C) Sequencing result to show the appearance of a premature stop codon in *pk11* gene in a *cut7* $\Delta$  BOE strain. (D) 3 viable strains after UV mutagenesis of *top3* $\Delta$  spores. (E) Summary of extragenic suppressor mutations of *cut7* $\Delta$  and *top3* $\Delta$ .

| Gene name            | Gene product                                                                     | Function | Viable colony # | Li et al (2019) BOE result | Li et al (2019) C-BOE mutation | <i>S. cerevisiae</i> (S288C) essentiality |
|----------------------|----------------------------------------------------------------------------------|----------|-----------------|----------------------------|--------------------------------|-------------------------------------------|
| <b>mrps17</b>        | <b>mitochondrial ribosomal protein subunit S17</b>                               |          | 7               | C-BOE, OP-BOE              | atp3, mts4                     | non-essential                             |
| <b>mrp21</b>         | <b>mitochondrial ribosomal protein subunit Mrp21</b>                             |          | 5               | C-BOE, OP-BOE              | atp3, mts4                     | non-essential                             |
| <b>mrp18</b>         | <b>mitochondrial ribosomal protein subunit L8</b>                                |          | 4               | C-BOE, OP-BOE              | atp3, mts4                     | non-essential                             |
| <b>cwf7</b>          | <b>Prp19 complex subunit</b>                                                     |          | 4               | non-bypassable             |                                | non-essential                             |
| <b>pir2</b>          | <b>NURS complex subunit, zf-C2H2 type zinc finger protein</b>                    |          | 3               | C-BOE                      | dis3                           | (unconserved)                             |
| <b>lip5</b>          | <b>mitochondrial lipoic acid synthetase Lip5</b>                                 |          | 1               | C-BOE                      | atd1                           | non-essential                             |
| <b>slm5</b>          | <b>mitochondrial asparagine-tRNA ligase</b>                                      |          | 0               | C-BOE, OP-BOE              | atp3, mts4                     | non-essential                             |
| <b>mug89</b>         | <b>phospholipid-translocating ATPase complex Lem3 family subunit</b>             |          | 0               | C-BOE, OP-BOE              | itr2                           | non-essential                             |
| <b>bms1</b>          | GTP binding protein Bms1                                                         |          | 0               | non-bypassable             |                                | essential                                 |
| <b>idi1</b>          | isopentenyl-diphosphate delta-isomerase                                          |          | 0               | non-bypassable             |                                | essential                                 |
| <b>rpn7</b>          | 19S proteasome regulatory subunit                                                |          | 0               | non-bypassable             |                                | essential                                 |
| <b>pac1</b>          | double-strand-specific ribonuclease                                              |          | 0               | non-bypassable             |                                | essential                                 |
| <b>cog2</b>          | Golgi transport complex subunit                                                  |          | 0               | non-bypassable             |                                | essential                                 |
| <b>erg1</b>          | squalene monooxygenase                                                           |          | 0               | non-bypassable             |                                | essential                                 |
| <b>tor2</b>          | serine/threonine protein kinase                                                  |          | 0               | non-bypassable             |                                | essential                                 |
| <b>erg9</b>          | farnesylidiphosphate:farnesylidiphosphatefarnesyltransferase                     |          | 0               | non-bypassable             |                                | essential                                 |
| <b>tsc13</b>         | enoyl reductase                                                                  |          | 0               | non-bypassable             |                                | essential                                 |
| <b>orc5</b>          | origin recognition complex subunit                                               |          | 0               | non-bypassable             |                                | essential                                 |
| <b>cut3</b>          | condensin complex SMC subunit Smc4                                               |          | 0               | non-bypassable             |                                | essential                                 |
| <b>prp2</b>          | U2 small nuclear RNA auxiliary factor small subunit, U2AF-59                     |          | 0               | non-bypassable             |                                | non-essential                             |
| <b>rpb4</b>          | DNA-directed RNA polymerase II complex subunit                                   |          | 0               | non-bypassable             |                                | non-essential                             |
| <b>cdc27</b>         | DNA polymerase delta subunit                                                     |          | 0               | non-bypassable             |                                | non-essential                             |
| <b>pop8</b>          | RNase P and RNase MRP subunit                                                    |          | 0               | non-bypassable             |                                | essential                                 |
| <b>mis12</b>         | Kinetochore component                                                            |          | 0               | non-bypassable             |                                | essential                                 |
| <b>psf2</b>          | GIN5 complex subunit                                                             |          | 0               | non-bypassable             |                                | essential                                 |
| <b>rrn11</b>         | RNA polymerase I general transcription initiation factor subunit                 |          | 0               | non-bypassable             |                                | essential                                 |
| <b>sed5</b>          | SNARE                                                                            |          | 0               | non-bypassable             |                                | essential                                 |
| <b>shq1</b>          | box H/ACA snoRNP assembly protein                                                |          | 0               | non-bypassable             |                                | essential                                 |
| <b>tim50</b>         | TIM23 translocase complex subunit                                                |          | 0               | non-bypassable             |                                | essential                                 |
| <b>nup44</b>         | <b>nucleoporin</b>                                                               |          | 17              | N.D.                       |                                | essential                                 |
| <b>sec22</b>         | <b>SNARE</b>                                                                     |          | 16              | N.D.                       |                                | non-essential                             |
| <b>plp2</b>          | <b>phosducin family protein</b>                                                  |          | 15              | N.D.                       |                                | essential                                 |
| <b>rsm23</b>         | <b>mitochondrial ribosomal protein subunit S23</b>                               |          | 10              | N.D.                       |                                | non-essential                             |
| <b>rrs1</b>          | <b>ribosome biogenesis protein</b>                                               |          | 8               | N.D.                       |                                | essential                                 |
| <b>pgs1</b>          | <b>CDP-diacylglycerol-glycerol-3-phosphate3-phosphatidyltransferase</b>          |          | 7               | N.D.                       |                                | essential                                 |
| <b>SPBC2F12.10</b>   | <b>mitochondrial ribosomal protein subunit L35</b>                               |          | 5               | N.D.                       |                                | non-essential                             |
| <b>rps1601</b>       | <b>40S ribosomal protein S16</b>                                                 |          | 5               | N.D.                       |                                | non-essential                             |
| <b>SPBC24C6.03</b>   | <b>mitochondrial proline-tRNA ligase</b>                                         |          | 5               | N.D.                       |                                | non-essential                             |
| <b>esf2</b>          | <b>U3 snoRNP-associated protein</b>                                              |          | 4               | N.D.                       |                                | essential                                 |
| <b>lsm3</b>          | <b>Lsm2-6 complex subunit</b>                                                    |          | 3               | N.D.                       |                                | essential                                 |
| <b>SPBC1A4.11c</b>   | <b>Schizosaccharomyces specific protein</b>                                      |          | 3               | N.D.                       |                                | (unconserved)                             |
| <b>SPBC2D10.08c</b>  | <b>mitochondrial ribosomal protein subunit Yml6</b>                              |          | 3               | N.D.                       |                                | essential                                 |
| <b>tuf1</b>          | <b>mitochondrial translation elongation factor EF-Tu</b>                         |          | 1               | N.D.                       |                                | non-essential                             |
| <b>cct8</b>          | chaperonin-containing T-complex theta subunit                                    |          | 0               | N.D.                       |                                | essential                                 |
| <b>ceg1</b>          | mRNA guanylyltransferase                                                         |          | 0               | N.D.                       |                                | essential                                 |
| <b>mrp17</b>         | mitochondrial ribosomal protein subunit L7                                       |          | 0               | N.D.                       |                                | non-essential                             |
| <b>trs20</b>         | TRAPP complex subunit Trs20                                                      |          | 0               | N.D.                       |                                | essential                                 |
| <b>tif35</b>         | translation initiation factor eIF3g                                              |          | 0               | N.D.                       |                                | essential                                 |
| <b>SPBC18H10.17c</b> | <b>mitochondrial recombinase Mhr1</b>                                            |          | 0               | N.D.                       |                                | non-essential                             |
| <b>clc1</b>          | clathrin light chain                                                             |          | 0               | N.D.                       |                                | non-essential                             |
| <b>spo14</b>         | GDP/GTP exchange factor, WD repeat protein                                       |          | 0               | N.D.                       |                                | essential                                 |
| <b>nop8</b>          | ribosome biogenesis protein                                                      |          | 0               | N.D.                       |                                | essential                                 |
| <b>apc10</b>         | anaphase-promoting complex substrate recognition subunit                         |          | 0               | N.D.                       |                                | non-essential                             |
| <b>tam41</b>         | mitochondrial phosphatidate cytidyltransferase                                   |          | 0               | N.D.                       |                                | essential                                 |
| <b>sof1</b>          | U3 snoRNP-associated protein                                                     |          | 0               | N.D.                       |                                | essential                                 |
| <b>cct3</b>          | chaperonin-containing T-complex gamma subunit                                    |          | 0               | N.D.                       |                                | essential                                 |
| <b>alp5</b>          | actin-like protein Arp4                                                          |          | 0               | N.D.                       |                                | essential                                 |
| <b>psf1</b>          | GIN5 complex subunit                                                             |          | 0               | N.D.                       |                                | essential                                 |
| <b>qcr1</b>          | mitochondrial processing peptidase (MPP) complex beta subunit Mas1               |          | 0               | N.D.                       |                                | essential                                 |
| <b>utp18</b>         | CGI-48 family                                                                    |          | 0               | N.D.                       |                                | essential                                 |
| <b>lcb1</b>          | serine palmitoyltransferase complex subunit                                      |          | 0               | N.D.                       |                                | essential                                 |
| <b>sim4</b>          | CENP-K ortholog                                                                  |          | 0               | N.D.                       |                                | non-essential                             |
| <b>mas2</b>          | mitochondrial processing peptidase (MPP) complex alpha subunit                   |          | 0               | N.D.                       |                                | essential                                 |
| <b>cut2</b>          | securin, sister chromatid separation inhibitor                                   |          | 0               | N.D.                       |                                | essential                                 |
| <b>sad1</b>          | spindle pole body SUN domain protein                                             |          | 0               | N.D.                       |                                | essential                                 |
| <b>cct1</b>          | chaperonin-containing T-complex alpha subunit                                    |          | 0               | N.D.                       |                                | essential                                 |
| <b>ned8</b>          | ubiquitin-like protein modifier for cullin                                       |          | 0               | N.D.                       |                                | non-essential                             |
| <b>cdc14</b>         | SIN component                                                                    |          | 0               | N.D.                       |                                | (unconserved)                             |
| <b>tbf1</b>          | DNA binding factor                                                               |          | 0               | N.D.                       |                                | essential                                 |
| <b>rad60</b>         | DNA repair protein, SUMO-related                                                 |          | 0               | N.D.                       |                                | non-essential                             |
| <b>ucp3</b>          | GTPase activating protein                                                        |          | 0               | N.D.                       |                                | non-essential                             |
| <b>pim1</b>          | RCC1 family Ran GDP/GTP exchange factor                                          |          | 0               | N.D.                       |                                | essential                                 |
| <b>slu7</b>          | splicing factor                                                                  |          | 0               | N.D.                       |                                | essential                                 |
| <b>kin17</b>         | human KIN ortholog                                                               |          | 0               | N.D.                       |                                | essential                                 |
| <b>psm1</b>          | mitotic cohesin complex ATPase subunit Psm1/Smc1                                 |          | 0               | N.D.                       |                                | essential                                 |
| <b>orc1</b>          | origin recognition complex subunit                                               |          | 0               | N.D.                       |                                | essential                                 |
| <b>SPBC2G5.05</b>    | <b>transketolase</b>                                                             |          | 0               | N.D.                       |                                | non-essential                             |
| <b>mrs1</b>          | mitochondrial and cytoplasmic arginine-tRNA ligase Rrs1/Mrs                      |          | 0               | N.D.                       |                                | essential                                 |
| <b>mot1</b>          | TATA-binding protein-associated transcription initiation repressor               |          | 0               | N.D.                       |                                | essential                                 |
| <b>smf1</b>          | Sm snRNP core protein                                                            |          | 0               | N.D.                       |                                | essential                                 |
| <b>hsp78</b>         | mitochondrial heatshock protein                                                  |          | 0               | N.D.                       |                                | non-essential                             |
| <b>spc24</b>         | Kinetochore component                                                            |          | 0               | N.D.                       |                                | essential                                 |
| <b>pic1</b>          | INCENP ortholog                                                                  |          | 0               | N.D.                       |                                | non-essential                             |
| <b>gtb1</b>          | gamma-tubulin                                                                    |          | 0               | N.D.                       |                                | essential                                 |
| <b>gcv3</b>          | glycine decarboxylase complex subunit H                                          |          | 0               | N.D.                       |                                | non-essential                             |
| <b>pop4</b>          | RNase P and RNase MRP subunit                                                    |          | 0               | N.D.                       |                                | essential                                 |
| <b>rio2</b>          | protein kinase, RIO family                                                       |          | 0               | N.D.                       |                                | essential                                 |
| <b>ypt1</b>          | GTPase                                                                           |          | 0               | N.D.                       |                                | essential                                 |
| <b>orc6</b>          | origin recognition complex subunit                                               |          | 0               | N.D.                       |                                | essential                                 |
| <b>gpt2</b>          | UDP-N-acetylglucosamine-dolichyl-phosphate N-acetylglucosaminophosphotransferase |          | 0               | N.D.                       |                                | essential                                 |
| <b>taf73</b>         | transcription factor TFIID complex subunit Taf5-like                             |          | 0               | N.D.                       |                                | essential                                 |
| <b>brf1</b>          | transcription factor TFIIB complex subunit                                       |          | 0               | N.D.                       |                                | essential                                 |

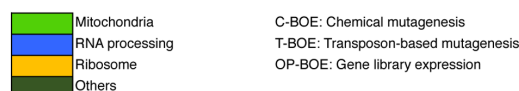

### Figure 3. Summary of BOE screening

The gene product was listed based on the information found in PomBase. Information on other BOE screens (Li et al. 2019) and *S. cerevisiae* orthologues (*Saccharomyces* Genome Database (SGD)) are also listed. Bold letters indicate bypassable essential genes identified in our study and/or Li et al. (2019).

## Figure 4

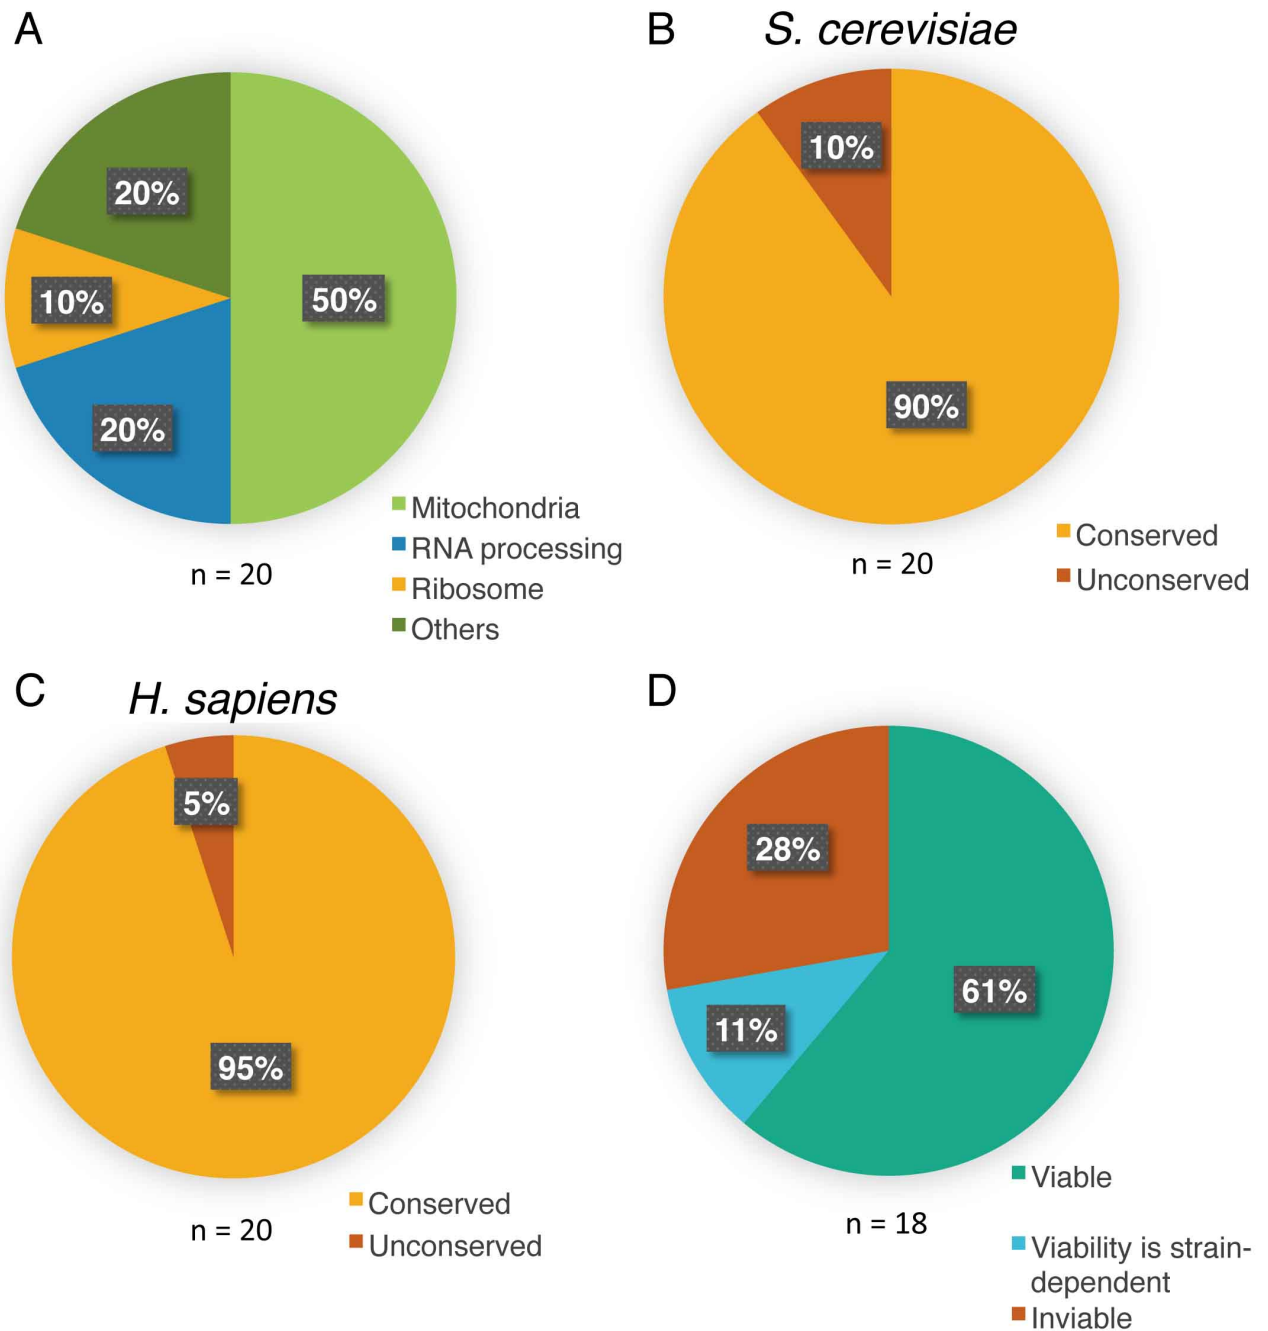

### Figure 4. Features of bypassable essential genes

(A) Classification of the function of 20 bypassable essential genes identified in this study. (B, C) Conservation of the identified genes in *S. cerevisiae* (B) or *H. sapiens* (C). (D) Essentiality of the *S. cerevisiae* orthologues (based on *Saccharomyces Genome Database (SGD)*).
